# Supplementary material for: Interdiffusion and crystallization of oppositely charged colloids
Source: Royal Society of Chemistry journal article supplement (doi:10.1039/c7cp05872a), 2017-01-01
Supplement: c7cp05872a1.pdf [file c7cp05872a1.pdf]

## **Electronic Supplementary Information**

Comparison between simulations performed without initial gap and  
with a 2 radii gap.

Manuella Cerbelaud, Công Tâm Tran, Riccardo Ferrando,  
Benoît Crespín and Arnaud Videcoq

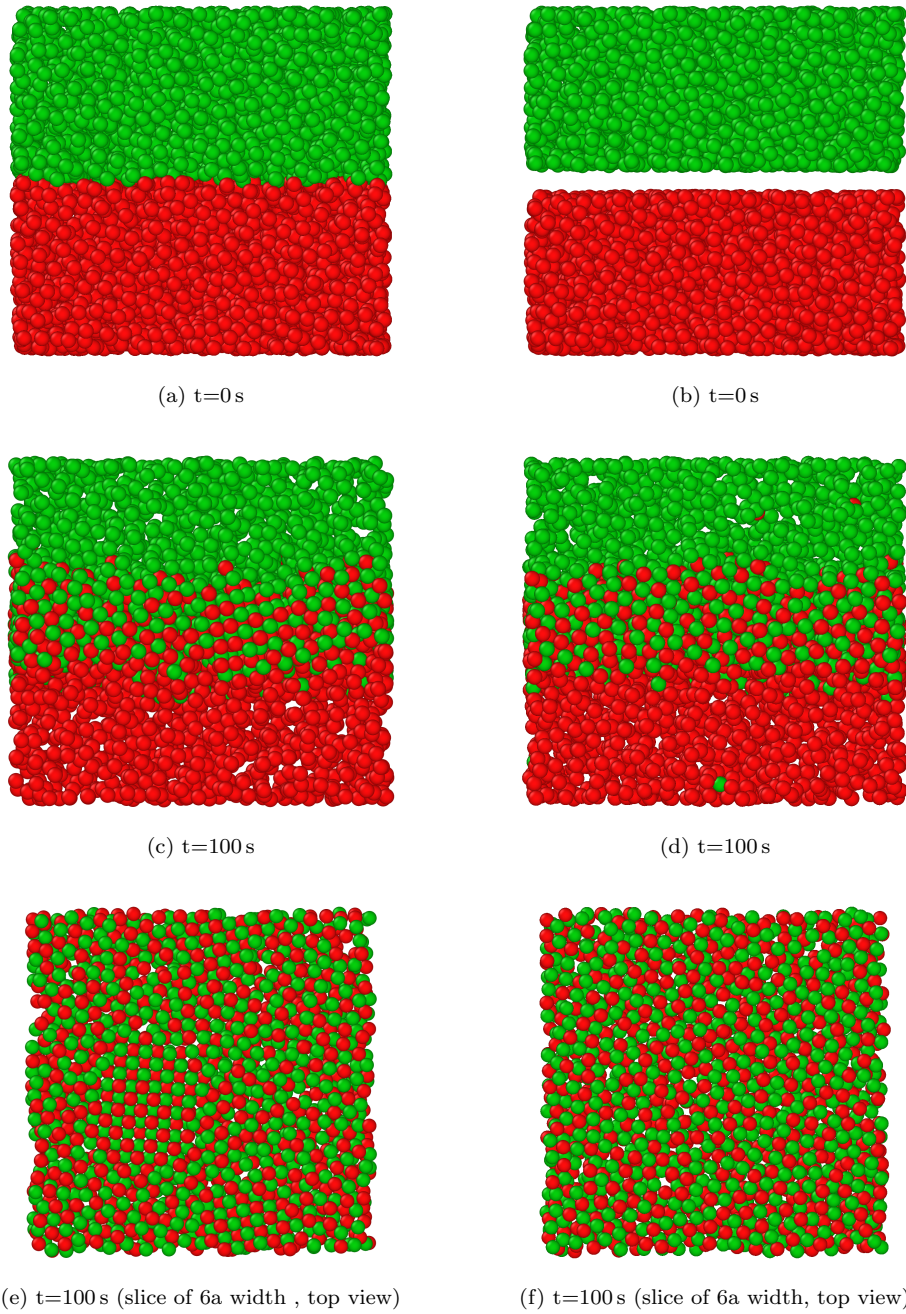

Figure 1: Snapshots of simulations at  $t = 0$  s and  $t = 100$  s performed with  $\phi = 0.2$ ,  $\kappa a = 5$  and  $U^* = 9$ : on the left without initial gap (a,c,e) and on the right with a  $2a$  initial gap (b,d,f).

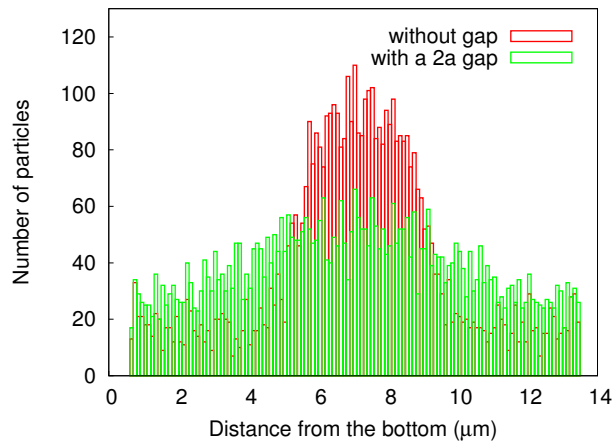

Figure 2: Number of particles as a function of the distance from the bottom of the box for simulations performed with  $\phi = 0.2$ ,  $\kappa a = 10$  and  $U^* = 9$  at  $t = 100$  s.
